# Supplementary material
Source: PubMed Central journal article supplement (PMC6314924)
Supplement: NIHMS977240-supplement-Supp_TableS1.pdf [file NIHMS977240-supplement-Supp_TableS1.pdf]

Supplementary Table 1: Sample sizes of RNA-seq datasets.

| <b>Species</b>           | <b>Region</b>   | <b>Time</b> | <b>Intruder Status</b> | <b>RNA-seq Samples</b> |
|--------------------------|-----------------|-------------|------------------------|------------------------|
| Honey Bee                | Mushroom Bodies | 30m         | Challenged             | 26                     |
| Honey Bee                | Mushroom Bodies | 30m         | Control                | 26                     |
| Honey Bee                | Mushroom Bodies | 60m         | Challenged             | 23                     |
| Honey Bee                | Mushroom Bodies | 60m         | Control                | 24                     |
| Honey Bee                | Mushroom Bodies | 120m        | Challenged             | 27                     |
| Honey Bee                | Mushroom Bodies | 120m        | Control                | 26                     |
| Mouse                    | Amygdala        | 30m         | Challenged             | 5                      |
| Mouse                    | Amygdala        | 30m         | Control                | 5                      |
| Mouse                    | Amygdala        | 60m         | Challenged             | 5                      |
| Mouse                    | Amygdala        | 60m         | Control                | 5                      |
| Mouse                    | Amygdala        | 120m        | Challenged             | 5                      |
| Mouse                    | Amygdala        | 120m        | Control                | 5                      |
| Mouse                    | Frontal Cortex  | 30m         | Challenged             | 5                      |
| Mouse                    | Frontal Cortex  | 30m         | Control                | 5                      |
| Mouse                    | Frontal Cortex  | 60m         | Challenged             | 5                      |
| Mouse                    | Frontal Cortex  | 60m         | Control                | 5                      |
| Mouse                    | Frontal Cortex  | 120m        | Challenged             | 6                      |
| Mouse                    | Frontal Cortex  | 120m        | Control                | 6                      |
| Mouse                    | Hypothalamus    | 30m         | Challenged             | 5                      |
| Mouse                    | Hypothalamus    | 30m         | Control                | 3                      |
| Mouse                    | Hypothalamus    | 60m         | Challenged             | 5                      |
| Mouse                    | Hypothalamus    | 60m         | Control                | 5                      |
| Mouse                    | Hypothalamus    | 120m        | Challenged             | 5                      |
| Mouse                    | Hypothalamus    | 120m        | Control                | 5                      |
| Three-Spined Stickleback | Diencephalon    | 30m         | Challenged             | 5                      |
| Three-Spined Stickleback | Diencephalon    | 30m         | Control                | 5                      |
| Three-Spined Stickleback | Diencephalon    | 60m         | Challenged             | 5                      |
| Three-Spined Stickleback | Diencephalon    | 60m         | Control                | 5                      |
| Three-Spined Stickleback | Diencephalon    | 120m        | Challenged             | 5                      |
| Three-Spined Stickleback | Diencephalon    | 120m        | Control                | 5                      |
| Three-Spined Stickleback | Telencephalon   | 30m         | Challenged             | 5                      |
| Three-Spined Stickleback | Telencephalon   | 30m         | Control                | 5                      |
| Three-Spined Stickleback | Telencephalon   | 60m         | Challenged             | 5                      |
| Three-Spined Stickleback | Telencephalon   | 60m         | Control                | 5                      |
| Three-Spined Stickleback | Telencephalon   | 120m        | Challenged             | 5                      |
| Three-Spined Stickleback | Telencephalon   | 120m        | Control                | 5                      |
